# 1 **Characteristics and outcomes of patients treated with sotrovimab** 2 **to prevent progression to severe COVID-19 in Belgium**

3 Myriam Drysdale<sup>1†\*</sup>, Thor Hautekiet<sup>2†</sup>, Moushmi Singh<sup>1</sup>, Joris Hautekiet<sup>3‡</sup>, Linda  
4 Ludikhuyze<sup>3</sup>, Vishal Patel<sup>1‡</sup>, Daniel C Gibbons<sup>1</sup>, Dorothee De Roeck<sup>4</sup>, Kirsten Colpaert<sup>5</sup>,  
5 Emily J Lloyd<sup>1</sup>, Eva Van Braeckel<sup>2,6</sup>

6 <sup>1</sup>GSK, Brentford, UK

7 <sup>2</sup>Department of Respiratory Medicine, Ghent University Hospital, Ghent, Belgium

8 <sup>3</sup>IQVIA Belux, Zaventem, Belgium

9 <sup>4</sup>GSK, Wavre, Belgium

10 <sup>5</sup>Department of Intensive Care, Ghent University Hospital, Ghent, Belgium

11 <sup>6</sup>Respiratory Infection and Defense Lab, Department of Internal Medicine and Pediatrics,  
12 Faculty of Medicine and Health Sciences, Ghent University, Ghent, Belgium

13

14

15 <sup>†</sup>Myriam Drysdale and Thor Hautekiet contributed equally to the manuscript.

16 <sup>‡</sup>Affiliation correct at time of study.

17

## 18 **Correspondence:**

19 \*Myriam Drysdale

20 myriam.g.drysdale@gsk.com

21

## 22 **ORCID IDs:**

23 Myriam Drysdale: 0000-0002-8994-2816

24 Daniel C Gibbons: 0000-0002-3769-9535

25 Eva Van Braeckel: 0000-0002-7242-0747

26

27

## 27 **Abstract**

28 **Background** Sotrovimab, a dual-action, engineered human monoclonal antibody, has been  
29 demonstrated to significantly reduce the risk of hospitalization and death in high-risk patients  
30 with COVID-19. Here, we describe the real-world use of, and outcomes from, sotrovimab

31 treatment in Belgium during the Delta and Omicron waves among patients with COVID-19 at  
32 high risk of developing severe disease.

33 **Methods** This was a multicentric, single-arm observational cohort study of non-hospitalized  
34 patients receiving outpatient sotrovimab treatment between 1 November 2021 and 2 August  
35 2022. We performed a retrospective analysis of hospital, pharmacy and administrative data  
36 from nine hospitals in Belgium. The primary outcomes were all-cause and COVID-19-related  
37 hospitalizations and all-cause deaths during the 29-day acute follow-up period from first  
38 administration of sotrovimab.

39 **Results** A total of 634 patients were included in the analysis (63.4% aged <65 years; 50.3%  
40 male). A high proportion (67.7%;  $n = 429/634$ ) of patients were immunocompromised, with  
41 36.9% ( $n = 234/634$ ) actively treated for malignancy. During the 29-day acute period, 12.5%  
42 ( $n = 79/634$ ) of sotrovimab-treated patients were hospitalized due to any cause (median  
43 duration 4 days; median time to hospitalization 14 days) and 1.1% ( $n = 7/634$ ) died due to  
44 any cause. In total, 0.8% ( $n = 5/634$ ) of patients were admitted to an intensive care unit  
45 (ICU). COVID-19-related hospitalization was experienced by 2.5% ( $n = 16/634$ ) of patients  
46 (median duration 10 days; median time to hospitalization 10.5 days), with 0.5% ( $n = 3/634$ )  
47 of patients admitted to an ICU. COVID-19-related hospitalization was experienced by 6.3%  
48 ( $n = 3/48$ ) of patients during Delta predominance (04/11/2021–23/12/2021), 6.3% ( $n = 1/16$ )  
49 of patients during Delta/BA.1 codominance (24/12/2021–01/01/2022), 1.4% ( $n = 3/218$ ) of  
50 patients during BA.1 predominance (02/01/2022–09/02/2022), 2.1% ( $n = 2/97$ ) of patients  
51 during BA.1/BA.2 codominance (10/02/2022–07/03/2022) and 2.7% ( $n = 7/255$ ) of patients  
52 during BA.2/BA.5 codominance (08/03/2022–02/08/2022).

53 **Conclusions** This observational study demonstrated consistently low rates of COVID-19-  
54 related hospitalizations and all-cause deaths in sotrovimab-treated patients during the  
55 Omicron subvariant periods in Belgium, despite over two-thirds of the study population being

56 immunocompromised. Comparative effectiveness studies are warranted to confirm  
57 sotrovimab effectiveness in highly immunocompromised patients with COVID-19.

58 **Keywords:** COVID-19; monoclonal antibody; Omicron BA.1; Omicron BA.2; SARS-CoV-2;  
59 sotrovimab

## 60 **Background**

61 Coronavirus disease 2019 (COVID-19) is caused by infection with severe acute respiratory  
62 syndrome coronavirus 2 (SARS-CoV-2); the rapid global spread of SARS-CoV-2 resulted in  
63 the declaration of a pandemic by the World Health Organization in March 2020 [1]. Globally,  
64 as of September 2023, there have been over 770 million confirmed cases of COVID-19,  
65 including nearly 7 million deaths [2]. In Belgium, almost 158,000 hospitalizations and 34,000  
66 deaths have been attributed to COVID-19 during the same period [2, 3].

67 Older individuals or those with immunosuppression, cancer, obesity, diabetes, or  
68 chronic kidney, lung, liver or cardiovascular disease are known to be at higher risk of  
69 developing severe COVID-19, which may result in hospitalization or death [4-6].

70 Sotrovimab is a dual-action, engineered human immunoglobulin G1 $\kappa$  monoclonal  
71 antibody (mAb) derived from the parental mAb S309, a potent neutralising mAb directed  
72 against the spike protein of SARS-CoV-2 [7-10]. Sotrovimab (administered as a single  
73 500 mg intravenous dose) was shown in COMET-ICE, a randomized clinical trial, to  
74 significantly reduce the risk of all-cause >24-hour hospitalization or death compared with  
75 placebo in high-risk patients with COVID-19 [11].

76 As a result of positive findings from COMET-ICE, sotrovimab received marketing  
77 authorization from the European Medicines Agency (EMA) in December 2021 for use in  
78 adults and adolescents (aged  $\geq 12$  years and weighing  $\geq 40$  kg) with COVID-19 who do not  
79 require oxygen supplementation and are at increased risk of progressing to severe

80 COVID-19 [12]. In Belgium, use of sotrovimab began prior to EMA approval as a result of a  
81 procurement framework contract issued by the European Commission in July 2021 that  
82 enabled participating European Union member states, including Belgium, to purchase  
83 sotrovimab prior to its marketing authorization [13, 14]. At the time of the study, mAbs  
84 (including sotrovimab) were recommended for the treatment of mild-to-moderate COVID-19  
85 among patients in Belgium at high risk of complications, following authorization by a  
86 multidisciplinary team including at least one infectious disease physician and one  
87 immunologist [15]. Due to limited supplies of mAbs, immunocompromised patients were  
88 considered the highest priority for mAb treatment [15].

89 Sotrovimab has been granted marketing authorization in the European Union,  
90 Norway, Iceland [16], Australia (conditional) [17], United Kingdom (conditional) [18], Saudi  
91 Arabia (conditional) [19] and Switzerland (conditional) [19]. In Japan, a Special Approval for  
92 Emergency designation has been granted [20]. Since the approval of sotrovimab, waves of  
93 new SARS-CoV-2 variants of concern have emerged, including the Delta variant and the  
94 Omicron BA.1, BA.2 and BA.5 subvariants; the latter became dominant in Belgium in June  
95 2022 [21-23]. *In vitro* neutralization studies have demonstrated a moderate fold shift in  
96 activity of sotrovimab against Omicron BA.2 relative to wild-type SARS-CoV-2 (16-fold  
97 change in  $EC_{50}$  relative to wild-type) [24]. A similar reduction in activity was reported for  
98 sotrovimab against BA.5 (22.6-fold change in  $EC_{50}$  relative to wild-type) [24]. Consequently,  
99 on 28 April 2022, the Federal Agency for Medicines and Health Products regulatory body in  
100 Belgium took the decision to no longer recommend the use of sotrovimab [25], although use  
101 continued among very-high-risk and/or immunocompromised patients.

102 In the absence of a clinical trial conducted during the Omicron predominance period,  
103 it remains uncertain how *in vitro* antibody neutralization activity correlates with clinical  
104 effectiveness, especially for dual-action antibodies like sotrovimab that have potent effector  
105 function, including antibody-dependent cellular cytotoxicity and antibody-dependent cellular  
106 phagocytosis [10, 26, 27]. Real-world studies are an important source of data with which to

107 assess clinical outcomes in patients treated with sotrovimab within the evolving variant  
108 landscape.

109 Here, we describe the real-world use of, and outcomes from, sotrovimab treatment  
110 for the management of patients with COVID-19 at high-risk of developing severe disease  
111 between 1 November 2021 and 2 August 2022 in Belgium, when the Delta variant and  
112 Omicron BA.1, BA.2 and BA.5 subvariants were predominant.

## 113 **Methods**

### 114 **Study design and data source**

115 In this single-arm observational cohort study, data were collected retrospectively from nine  
116 centres (including two university hospitals) located in Flanders, Brussels and Wallonia that  
117 administered sotrovimab in an outpatient setting from 1 November 2021 up to and including  
118 2 August 2022. Patient-level data were collected and aggregated from three main sources:  
119 1) registered administrative, medical and nursing data, which are fully structured and  
120 standardized across all hospitals and therefore require no specific technology to be  
121 implemented for data retrieval; 2) structured and standardized hospital pharmacy or  
122 invoicing data using predefined Anatomical Therapeutic Chemical (ATC) codes to capture  
123 the date of sotrovimab administration; 3) administrative data regarding hospital admission  
124 and transfer.

125 The index date (Day 1) was defined as the date of first treatment administration with  
126 sotrovimab. The baseline period was defined as the 1 year prior to index for assessment of  
127 prior comorbidities. All-cause and COVID-19-related outcomes were reported during the  
128 acute period, defined as the 29-day follow-up period starting on the index date. End of  
129 follow-up was defined as either the end of the acute period, death or the study end (31  
130 August 2022), whichever occurred first.

131 This study complies with all applicable laws regarding subject privacy. No direct  
132 subject contact or primary collection of individual human subject data occurred. Study results  
133 were in tabular form and were aggregate analyses that omitted subject identification;  
134 therefore, informed consent was not required. Ethics committee approval was obtained from  
135 each of the participating centres, with the exception of AZ Maria Middelaes, AZ Groeninge  
136 and Jan Yperman where approval was provided by a data access committee.

### 137 **Study population**

138 Non-hospitalized patients infected with SARS-CoV-2 were eligible for inclusion if they were  
139 aged  $\geq 12$  years on the index date and received outpatient treatment with sotrovimab for the  
140 first time during the study period.

141 Patients were excluded if they received sotrovimab in an inpatient setting and/or  
142 received remdesivir as an early treatment in an outpatient setting during the acute period.  
143 However, in three of the study centres, patients routinely stayed in hospital overnight after  
144 sotrovimab administration for logistical (i.e. for monitoring post treatment administration)  
145 rather than medical reasons; therefore, the exclusion criteria were adapted for these centres  
146 to include patients discharged the day after sotrovimab administration.

### 147 **Study outcomes**

148 Patient demographics and clinical characteristics were collected based on the presence of  
149 selected International Classification of Disease version 10 (ICD-10) and ATC codes (Tables  
150 S1–S3) during any hospital visit that occurred in the 12 months prior to the index date.  
151 These included age, sex, and comorbidities and risk factors that may predispose patients to  
152 severe COVID-19 outcomes, as follows: immunocompromised status (human  
153 immunodeficiency virus infection/acquired immunodeficiency syndrome, treatment for solid  
154 tumours, haematological malignancy, solid organ or haematopoietic stem cell  
155 transplantation, primary immune deficiency, receiving immunosuppressive drugs [see **Table**  
156 **S1**], sickle-cell anaemia, major thalassaemia, asplenia); other risk factors or comorbidities of

157 interest (age  $\geq 65$  years old, obesity, type 1 or type 2 diabetes mellitus, chronic lung disease  
158 including asthma and cystic fibrosis, cardiovascular disease including uncontrolled  
159 hypertension, chronic kidney disease [CKD; estimated glomerular filtration rate  $< 30$  ml/min]  
160 including treatment via haemodialysis, chronic liver disease [Child–Pugh B or C], chronic  
161 neurological disease). These comorbidities and risk factors for severe COVID-19 aligned  
162 with those reported by the Scientific Institute for Public Health of the Federal Belgian State  
163 (Sciensano) and the US Centers for Disease Control and Prevention [5, 6].

164 The clinical outcomes of this study included the number and proportion of all-cause  
165 and COVID-19-related hospitalizations and all-cause deaths during the acute period (29  
166 days after the index date). COVID-19-related hospitalizations were defined as having the  
167 following ICD-10 codes registered as the verified admission diagnosis: B34.2, B97.2 or  
168 U07.1 (**Table S2**). In a *post hoc* analysis, cause of death data were collected for patients at  
169 Ghent University Hospital and the proportion of COVID-19-related deaths was determined;  
170 only all-cause deaths are reported for the other centres.

171 The number and proportion of all-cause and COVID-19-related hospitalizations and  
172 all-cause deaths among sotrovimab-treated patients were reported for the overall population  
173 and stratified by week and month, as well by the period of SARS-CoV-2 variant  
174 predominance in Belgium [28], as follows: Delta predominance period, 4 November 2021–  
175 23 December 2021; Delta/BA.1 codominance period, 24 December 2021–1 January 2022;  
176 BA.1 predominance period, 2 January 2022–9 February 2022; BA.1/BA.2 codominance  
177 period, 10 February 2022–7 March 2022; BA.2/BA.5 codominance period, 8 March 2022–2  
178 August 2022 (Fig. 1). The study design did not enable collection of polymerase chain  
179 reaction results in order to identify the SARS-CoV-2 variant strains that patients were  
180 infected with. Rather, to map the 29-day outcomes with the circulating variants, we used a  
181 proxy based on the most prevalent strains circulating in Belgium per week, as provided by  
182 Sciensano [28].

183           In addition, the length of stay (defined as number of hospitalization days), time to  
184 hospitalization after the index date, number and proportion of patients admitted to intensive  
185 care, and the number and proportion of patients receiving non-invasive or mechanical  
186 ventilation during all-cause or COVID-19-related hospitalization were captured during the  
187 acute period.

188           In an exploratory analysis, all-cause and COVID-19-related new hospitalizations and  
189 all-cause deaths reported during the post-acute period, defined as the period between Day  
190 30 and Day 90 after the index date, were assessed. Data for the exploratory analysis could  
191 only be collected for patients identified on or before 1 June 2022 to allow time for Day 30–90  
192 follow-up to be completed before the end of the study period (31 August 2022).

### 193 **Data analysis**

194 Descriptive analyses were performed. For continuous variables, the mean, standard  
195 deviation (SD), median and interquartile range (IQR) were calculated. Proportions were  
196 calculated using the total number of eligible patients treated with sotrovimab as the  
197 denominator, unless otherwise specified. The prevalence of hospitalization or death during  
198 the respective SARS-CoV-2 variant predominance periods was calculated as the number of  
199 patients who experienced that event during the variant predominance period divided by the  
200 total number of sotrovimab-treated patients during that period multiplied by 100.

201           For post-acute 90-day outcomes, the proportions of hospitalizations (all-cause and  
202 COVID-19-related) and deaths (all-cause) were calculated among the number of patients  
203 treated with sotrovimab who were still alive at the beginning of the post-acute period and had  
204 completed the 90-day follow-up.



## 205 Results

### 206 Patient identification and characteristics

207 Following application of the inclusion and exclusion criteria, 634 patients were included in  
208 the study (**Table 1**). A total of 598 patients identified across the study centres had received  
209 sotrovimab while already hospitalized and were excluded from the study. No patients  
210 identified had received remdesivir as an outpatient during the acute COVID-19 infection  
211 period.

212 **Table 1** Number of patients excluded and included per study centre (1 November 2021–2  
213 August 2022)

| Study centre              | Number of patients identified as treated with sotrovimab | Non-eligible                                                          |                                                                                       | Number of patients eligible for inclusion in study analysis |
|---------------------------|----------------------------------------------------------|-----------------------------------------------------------------------|---------------------------------------------------------------------------------------|-------------------------------------------------------------|
|                           |                                                          | Number of patients treated with sotrovimab in a hospitalized setting* | Number of patients treated with remdesivir during the acute COVID-19 infection period |                                                             |
| UZ Gent                   | 650                                                      | 272                                                                   | 0                                                                                     | 378                                                         |
| Hôpital Erasme            | 119                                                      | 70                                                                    | 0                                                                                     | 49                                                          |
| AZ Damiaan                | 26                                                       | 22                                                                    | 0                                                                                     | 4                                                           |
| AZ Groeninge              | 58                                                       | 27                                                                    | 0                                                                                     | 31                                                          |
| AZ Jan Yperman            | 73                                                       | 28                                                                    | 0                                                                                     | 45                                                          |
| AZ Sint-Lucas             | 48                                                       | 31                                                                    | 0                                                                                     | 17                                                          |
| AZ Maria Middelaes        | 149                                                      | 78                                                                    | 0                                                                                     | 71                                                          |
| CHU Ambroise Paré         | 35                                                       | 13                                                                    | 0                                                                                     | 22                                                          |
| CHU Clinique Saint-Pierre | 74                                                       | 57                                                                    | 0                                                                                     | 17                                                          |
| <b>Total</b>              | <b>1232</b>                                              | <b>598</b>                                                            | <b>0</b>                                                                              | <b>N = 634</b>                                              |

214

215 \*At AZ Sint-Lucas, CHU Clinique Saint-Pierre and CHU Ambroise Paré, patients routinely stayed in hospital  
216 overnight after sotrovimab administration for logistical (i.e. for monitoring post treatment administration) rather  
217 than medical reasons; therefore, the exclusion criteria were adapted for these centres to include patients  
218 discharged the day after sotrovimab administration

219 **Table 2** presents the baseline demographic and clinical characteristics among  
220 sotrovimab-treated patients included in the analysis. The patients were predominantly aged  
221 <65 years (63.4%,  $n = 402/634$ ), with more than one-third (38.6%,  $n = 245/634$ ) of patients  
222 aged 18–54 years. Half of the patients (50.3%,  $n = 319/634$ ) were male, and 67.7% ( $n =$   
223  $429/634$ ) were immunocompromised and thus considered at high risk of developing COVID-  
224 19 complications. Most of the immunocompromised patients had a malignancy and were  
225 undergoing treatment with antineoplastic agents, endocrine therapies or immunostimulants  
226 (36.9%,  $n = 234/634$ ), or had primary immune deficiency (29.7%,  $n = 188/634$ ) or a  
227 haematological malignancy (25.4%,  $n = 161/634$ ). With respect to the other risk factors and  
228 comorbidities of interest (excluding age  $\geq 65$  years), cardiovascular disease (17.7%,  $n =$   
229  $112/634$ ), diabetes (12.3%,  $n = 78/634$ ) and CKD (10.6%,  $n = 67/634$ ) were the most  
230 common.

231 **Table 2** Patient characteristics

| Characteristic                                                                                          | Sotrovimab<br>( $N = 634$ ) |
|---------------------------------------------------------------------------------------------------------|-----------------------------|
| <b>Age group, years, <math>n</math> (%)</b>                                                             |                             |
| 12–17                                                                                                   | 23 (3.6)                    |
| 18–54                                                                                                   | 245 (38.6)                  |
| 55–64                                                                                                   | 134 (21.1)                  |
| 65–74                                                                                                   | 140 (22.1)                  |
| $\geq 75$                                                                                               | 92 (14.5)                   |
| <b>Male sex, <math>n</math> (%)</b>                                                                     | 319 (50.3)                  |
| <b>Immunocompromised patients at high risk of developing COVID-19 complications, <math>n</math> (%)</b> |                             |
| $\geq 1$ high-risk criterion                                                                            | 429 (67.7)                  |
| HIV/AIDS                                                                                                | 4 (0.6)                     |
| Solid tumour                                                                                            | 85 (13.4)                   |
| Cancer undergoing treatment: radiotherapy                                                               | 0                           |
| Cancer undergoing treatment: radio- or chemotherapy                                                     | 8 (1.3)                     |

|                                                                   |            |
|-------------------------------------------------------------------|------------|
| Cancer undergoing treatment: drugs                                | 234 (36.9) |
| Haematological malignancy                                         | 161 (25.4) |
| Solid organ or haematopoietic stem cell transplantation           | 121 (19.1) |
| Primary immune deficiency                                         | 188 (29.7) |
| Immunosuppressive drugs                                           | 120 (18.9) |
| Sickle cell anaemia                                               | 3 (0.5)    |
| Major thalassaemia                                                | 0          |
| Asplenia                                                          | 0          |
| <b>Other risk factors/comorbidities of interest, n (%)</b>        |            |
| ≥1 other comorbidity of interest                                  | 364 (57.4) |
| Age ≥65 years                                                     | 232 (36.6) |
| Obesity with BMI ≥30 kg/m <sup>2</sup>                            | 42 (6.6)   |
| Type 1 or type 2 diabetes mellitus                                | 78 (12.3)  |
| Chronic lung disease, including asthma                            | 36 (5.7)   |
| Cardiovascular disease, including uncontrolled hypertension       | 112 (17.7) |
| Chronic kidney disease (eGFR <30 ml/min), including haemodialysis | 67 (10.6)  |
| Chronic liver disease (Child–Pugh B or C)                         | 30 (4.7)   |
| Chronic neurological disease                                      | 23 (3.6)   |

232 AIDS=acquired immunodeficiency syndrome; BMI=body mass index; COVID-19=coronavirus disease 2019;

233 eGFR=estimated glomerular filtration rate; HIV=human immunodeficiency virus

## 234 **Overall analysis of acute period (29-day) clinical outcomes**

### 235 ***All-cause clinical outcomes***

236 Among the 634 sotrovimab-treated patients, 82 (12.9%) were hospitalized or died due to any  
 237 cause within the 29-day acute period (**Table 3**). Seventy-nine (12.5%) patients were  
 238 hospitalized for any cause and seven (1.1%) died due to any cause during the 29-day acute  
 239 period. Of the 79 patients who had all-cause hospitalization events, 12 (15.2%) had more  
 240 than one hospitalization event during the acute phase. Among hospitalized patients, the  
 241 median (IQR) duration of the first all-cause hospitalization was 4.0 (2.0, 9.0) days. Median  
 242 (IQR) time to first all-cause hospitalization from the index date was 14.0 (9.5, 22.0) days.  
 243 Five (6.3%) of the patients with all-cause hospitalizations were admitted to the intensive care  
 244 unit (ICU), with a median (IQR) stay of 6.0 (4.0, 9.0) ICU days. Two patients required  
 245 mechanical ventilation and one patient required non-invasive ventilation.

### 246 ***COVID-19-related clinical outcomes***

247 COVID-19-related hospitalizations during the 29-day acute period were experienced by 2.5%  
 248 ( $n = 16/634$ ) of patients (**Table 3**). The median (IQR) duration of stay was 10.0 (6.8, 14.2)  
 249 days. Median (IQR) time to hospitalization from the index date was 10.5 (2.2, 20.8) days. Of  
 250 patients with COVID-19-related hospitalizations, three (18.8%) were admitted to an ICU, with  
 251 a median (IQR) stay of 4.0 (4.0, 6.5) ICU days. One patient required mechanical ventilation.

252 Of the 378 patients treated with sotrovimab at Ghent University Hospital, four (1.1%)  
 253 died due to any cause, including one patient who died as a result of COVID-19  
 254 complications.

255 **Table 3** Acute period (29-day) all-cause and COVID-19-related outcomes

| Outcome                                                          | Patients treated with sotrovimab<br>(N = 634) |
|------------------------------------------------------------------|-----------------------------------------------|
| All-cause hospitalization or death, $n$ (%)                      | 82 (12.9)                                     |
| All-cause hospitalization, $n$ (%)                               | 79 (12.5)                                     |
| All-cause hospitalization events, $n$ (%)                        |                                               |
| 0                                                                | 555 (87.5)                                    |
| 1                                                                | 67 (10.6)                                     |
| 2                                                                | 10 (1.6)                                      |
| 3                                                                | 2 (0.3)                                       |
| All-cause deaths, $n$ (%)                                        | 7 (1.1)                                       |
| Number of all-cause hospitalization days                         |                                               |
| Mean (SD)                                                        | 8.3 (12.5)                                    |
| Median (IQR)                                                     | 4.0 (7.0)                                     |
| Time to hospitalization from index date in days                  |                                               |
| Mean (SD)                                                        | 14.9 (7.8)                                    |
| Median (IQR)                                                     | 14.0 (12.5)                                   |
| All-cause ICU admission, $n$ (%)                                 | 5 (0.8)                                       |
| Number of ICU days                                               |                                               |
| Mean (SD)                                                        | 7.2 (3.8)                                     |
| Median (IQR)                                                     | 6.0 (5.0)                                     |
| All-cause non-invasive ventilation, $n$ (%)                      | 1 (0.2)                                       |
| All-cause mechanical ventilation, $n$ (%)                        | 2 (0.3)                                       |
| COVID-19-related hospitalization, $n$ (%)                        | 16 (2.5)*                                     |
| Number of COVID-19-related hospitalization days                  |                                               |
| Mean (SD)                                                        | 14.0 (16.3)                                   |
| Median (IQR)                                                     | 10.0 (7.5)                                    |
| Time to COVID-19-related hospitalization from index date in days | 11.4 (8.9)                                    |

|                                                                         |                        |
|-------------------------------------------------------------------------|------------------------|
| Mean (SD)<br>Median (IQR)                                               | 10.5 (18.5)            |
| <b>COVID-19-related ICU admission, <i>n</i> (%)</b>                     | 3 (0.5)                |
| <b>Number of COVID-19-related ICU days</b><br>Mean (SD)<br>Median (IQR) | 5.7 (2.9)<br>4.0 (2.5) |
| <b>COVID-19-related non-invasive ventilation, <i>n</i> (%)</b>          | 0                      |
| <b>COVID-19-related mechanical ventilation, <i>n</i> (%)</b>            | 1 (0.2)                |

256

257 \*Fifteen patients (2.4%) had a first COVID-19-related hospitalization during the 29-day acute period. One patient  
258 was hospitalized for the first time during the 29-day acute period for reasons unrelated to COVID-19, but a  
259 subsequent hospitalization during the same period was COVID-related. COVID-19=coronavirus disease 2019,  
260 ICU=intensive care unit, IQR=interquartile range, SD=standard deviation

### 261 **Acute period (29-day) clinical outcomes during periods of Delta and Omicron** 262 **predominance**

263 The 29-day acute period all-cause and COVID-19-related outcomes by period of SARS-  
264 CoV-2 variant predominance are shown in **Table 4**. The largest number of sotrovimab-  
265 treated patients were observed during the BA.1 (34.4%,  $n = 218/634$ ) and BA.2/BA.5  
266 codominance (40.2%,  $n = 255/634$ ) periods.

267 During the Delta predominance period, the proportion of sotrovimab-treated patients  
268 hospitalized due to any cause was 22.9% ( $n = 11/48$ ). During the Delta/BA.1 codominance,  
269 BA.1 predominance, BA.1/BA.2 codominance and BA.2/BA.5 codominance periods, all-  
270 cause hospitalizations were experienced by 18.8% ( $n = 3/16$ ), 11.5% ( $n = 25/218$ ), 8.2% ( $n =$   
271  $8/97$ ) and 12.5% ( $n = 32/255$ ) of patients, respectively.

272 COVID-19-related hospitalizations were experienced by 6.3% ( $n = 3/48$ ) of  
273 sotrovimab-treated patients during the period of Delta predominance, 6.3% ( $n = 1/16$ ) in the  
274 Delta/BA.1 codominance period, 1.4% ( $n = 3/218$ ) in the BA.1 predominance period, 2.1% ( $n$   
275  $= 2/97$ ) in the BA.1/BA.2 codominance period and 2.7% ( $n = 7/255$ ) in the BA.2/BA.5  
276 codominance period (**Table 4**).

277 No sotrovimab-treated patients died during the Delta predominance period (**Table 4**).  
 278 During the Delta/BA.1 codominance period, one sotrovimab-treated patient died ( $n = 1/16$ ).  
 279 Two patients died in each of the BA.1 predominance ( $n = 2/218$ ), BA.1/BA.2 codominance ( $n$   
 280  $= 2/97$ ) and BA.2/BA.5 codominance ( $n = 2/255$ ) periods.

281 **Table 4** Acute period (29-day) all-cause and COVID-19-related outcomes by period of  
 282 SARS-CoV-2 variant predominance

| Outcome                                     | Overall      | Delta<br>predominance<br>04/11/2021–<br>23/12/2021 | Delta/BA.1<br>codominance<br>24/12/2021–<br>01/01/2022 | BA.1<br>predominance<br>02/01/2022–<br>09/02/2022 | BA.1/BA.2<br>codominance<br>10/02/2022–<br>07/03/2022 | BA.2/BA.5<br>codominance*<br>08/03/2022–<br>02/08/2022 |
|---------------------------------------------|--------------|----------------------------------------------------|--------------------------------------------------------|---------------------------------------------------|-------------------------------------------------------|--------------------------------------------------------|
| Number of patients treated with sotrovimab  | 634          | 48                                                 | 16                                                     | 218                                               | 97                                                    | 255                                                    |
| Hospitalized due to any cause, $n$ (%)      | 79<br>(12.5) | 11<br>(22.9)                                       | 3<br>(18.8)                                            | 25<br>(11.5)                                      | 8<br>(8.2)                                            | 32<br>(12.5)                                           |
| Hospitalized due to COVID-19, $n$ (%)       | 16<br>(2.5)  | 3<br>(6.3)                                         | 1<br>(6.3)                                             | 3<br>(1.4)                                        | 2<br>(2.1)                                            | 7<br>(2.7)                                             |
| Hospitalized due to unknown reason, $n$ (%) | 7<br>(1.1)   | 0<br>(0.0)                                         | 1<br>(6.3)                                             | 6<br>(2.8)                                        | 0<br>(0.0)                                            | 0<br>(0.0)                                             |
| Died due to any cause, $n$ (%)              | 7<br>(1.1)   | 0<br>(0.0)                                         | 1<br>(6.3)                                             | 2<br>(0.9)                                        | 2<br>(2.1)                                            | 2<br>(0.8)                                             |

283  
 284 \*BA.5 took over from BA.2 as the dominant strain on 25 June 2022. COVID-19=coronavirus disease 2019,  
 285 SARS-CoV-2=severe acute respiratory syndrome coronavirus 2

286 **Exploratory analysis of post-acute period (30–90-day) clinical outcomes**

287 In total, 625 patients had follow-up data available for the post-acute period, defined as 30–  
 288 90 days after the first sotrovimab administration (index date). Among these patients, 13.8%  
 289 ( $n = 86/625$ ) had a new hospitalization event (any cause), 1.6% ( $n = 10/625$ ) had a COVID-

290 19-related hospitalization and 1.1% ( $n = 7/625$ ) died due to any cause during the post-acute  
291 period.

292 At Ghent University Hospital, 30–90-day follow-up data were available for 374  
293 patients. Among these patients, five died (1.3%), with two deaths due to COVID-19-related  
294 reasons.

## 295 **Discussion**

296 This single-arm, retrospective study describes the real-world clinical outcomes of patients  
297 with COVID-19 who received sotrovimab treatment across nine hospitals in Belgium  
298 between 1 November 2021 and 31 August 2022. Over two-thirds (67.7%) of the patients in  
299 this study had at least one immunocompromising condition, with over one-third of patients  
300 (36.9%) receiving chemotherapy for an underlying malignancy. Other commonly reported  
301 risk factors for progression to severe COVID-19 were age  $\geq 65$  years old, cardiovascular  
302 diseases (including uncontrolled hypertension), diabetes and CKD. Comparatively, national  
303 hospital surveillance, conducted by Sciensano, identified hypertension, cardiovascular  
304 disease and diabetes as the top three most frequently reported comorbidities among  
305 patients with COVID-19 hospitalized in Belgium over the course of the pandemic [29].

306 During this study, 12.9% of patients ( $n = 82/634$ ) treated with sotrovimab were  
307 hospitalized or died due to any cause during the 29-day acute period. This rate is relatively  
308 high compared with rates reported in other retrospective or observational studies (all-cause  
309 hospitalization and/or mortality ranged from 2.1% to 2.7% during the BA.1 predominance  
310 period and from 1.7% to 2.0% during the BA.2 predominance period in a recent systematic  
311 literature review reporting on the real-world effectiveness of sotrovimab [30]), but this may be  
312 potentially explained by several observations. Firstly, high proportions of all-cause and  
313 COVID-19-related hospitalizations were mainly observed among sotrovimab-treated patients  
314 during the Delta predominance period (4 November to 23 December 2021) in Belgium.

315 These observations align with nationally reported records of high rates of COVID-19-related  
316 hospitalization (12,588 admissions) and deaths (1935) during the Delta predominance period  
317 [3, 31] and may reflect the higher disease severity, higher prevalence and more rigorous  
318 public health measures associated with the Delta variant relative to subsequent Omicron  
319 variants, as well as lower immunity within the population [32, 33]. Additionally, the present  
320 study period spanned four SARS-CoV-2 variants (Delta, BA.1, BA.2 and BA.5) compared  
321 with one to two variants (primarily BA.1 or BA.2) in other studies [34-36]. Furthermore, the  
322 current study had a relatively high proportion of patients with at least one  
323 immunocompromising condition (67.7%) compared with other studies [34, 35, 37, 38]. This  
324 higher proportion of high-risk patients, necessitating regular inpatient treatment for their  
325 underlying conditions, may explain the relatively higher rate of all-cause hospitalization or  
326 mortality observed in this current study compared with other real-world studies [30, 34, 35,  
327 39].

328 In a recent Danish cohort study, 83% of 2933 sotrovimab-treated patients belonged  
329 to very-high-risk groups that included haematological malignancy, solid organ  
330 transplantation, and treatment with anti-CD20 for non-malignant haematological diseases  
331 within the previous year. Within 90 days of sotrovimab treatment (696 person-years), 30.2%  
332 of patients were hospitalized and 5.3% had died due to any cause. The highest prognostic  
333 factor was haematological malignancy, followed by age  $\geq 65$  years [40]. Comparatively, in our  
334 study, 68% of patients had at least one immunocompromising condition. A quarter (25.4%)  
335 of patients had a haematological malignancy and 36.6% were aged  $\geq 65$  years; our 30–90-  
336 day results show that 13.8% of patients had a new hospitalization event (any cause), and  
337 1.1% died due to any cause. Similar to our findings, the Danish study found a higher  
338 proportion of hospitalization and death associated with the Delta variant, but no major differences  
339 in these outcomes were observed between the Omicron BA.1 and BA.2 variants [40].

340 In our study population, the proportion of sotrovimab-treated patients experiencing  
341 COVID-19-related hospitalization was highest during the Delta predominance and



342 Delta/BA.1 codominance (both 6.3%) periods. During the BA.1 predominance, BA.1/BA.2  
343 codominance and BA.2/BA.5 codominance periods, COVID-19-related hospitalizations were  
344 consistently low (all  $\leq 2.7\%$ ). The median duration of hospitalization in our study (10.0 days)  
345 was higher than the national reported figure for Belgium, of 2 days, during the Omicron  
346 predominance period [41]; however, the median duration of ICU stays (4.0 days) was the  
347 same as the national median duration reported for Belgium [41]. It should be noted that the  
348 number of patients admitted to an ICU was low ( $n = 3$ ), which limits interpretation.

349         This study has several potential limitations that should be considered. Firstly, this  
350 descriptive, single-arm study did not include a comparator arm, such as patients with similar  
351 risk profiles who did not receive sotrovimab after SARS-CoV-2 infection. We were not able to  
352 derive a control group due to a lack of similarly high-risk patients who had not received  
353 sotrovimab treatment and because patients who did not receive sotrovimab and were not  
354 hospitalized were not accounted for in the data used in this study. As a result, it is difficult to  
355 infer an association between sotrovimab treatment and clinical outcomes from these data  
356 alone. Due to the retrospective, observational study design, variables such as vaccination  
357 status and disease severity at enrolment could not be extracted, as these were not  
358 structurally reported and standardized in all hospitals. However, vaccination rates in Belgium  
359 had reached 73% by the start of this study [42] (and were presumably higher in high-risk  
360 groups similar to this study population). Furthermore, one might assume a high vaccination  
361 uptake in this population, with patients having received regular follow-up at their treating  
362 hospital and being eligible for early treatment with mAbs. Patients who received sotrovimab  
363 as an inpatient were excluded from the study, with the exception of patients who were  
364 discharged the day after sotrovimab administration. This comprised a large proportion of the  
365 total number of patients identified (48.5% [ $n = 598/1232$ ], potentially inducing selection bias  
366 in the analyses and limiting the generalizability of the findings. In addition, patients who  
367 received sotrovimab in one of the selected hospitals but were later admitted to a different  
368 hospital where they progressed to severe disease may not have been captured in our study

369 given its retrospective nature. However, as sotrovimab is expected to be primarily used in  
370 patients at risk of progressing to severe outcomes, such as those who are  
371 immunocompromised, these patients were likely associated with a reference hospital given  
372 their need for frequent medical care; therefore, missing data for clinical outcomes were likely  
373 to be low. Similarly, data on the uptake of immunosuppressant drugs and diagnosis of  
374 comorbidities were only extractable for patients who were treated or diagnosed in the same  
375 hospital where they received their sotrovimab treatment. Information on drugs received in  
376 another hospital or prescribed in primary care were not available. Therefore, the number of  
377 patients who were at high risk of developing severe COVID-19 disease may have been  
378 underestimated. Lastly, as variant sequencing was not routinely undertaken, the specific  
379 SARS-CoV-2 variant with which patients were infected could not be determined. Instead, an  
380 ecological design was proposed that used the periods of Delta, BA.1, BA.2 and BA.5  
381 subvariant predominance and codominance as a proxy for the infecting variant. National  
382 genomic surveillance data were used to stratify the study periods into circulating variant  
383 predominance periods [28].

## 384 **Conclusions**

385 This observational study demonstrated consistently low rates of COVID-19-related  
386 hospitalizations and all-cause deaths in sotrovimab-treated patients during the Omicron  
387 subvariant predominance periods in Belgium, despite the reported decrease in *in vitro*  
388 neutralization activity of sotrovimab against BA.2 and BA.5, and over two-thirds of the study  
389 population being immunocompromised. Comparative effectiveness studies are warranted to  
390 confirm the effectiveness of sotrovimab in highly immunocompromised patients with COVID-  
391 19.

## 392 **List of abbreviations**

393 ATC            Anatomical Therapeutic Chemical  
394 CKD            chronic kidney disease

|     |            |                                                    |
|-----|------------|----------------------------------------------------|
| 395 | COVID-19   | coronavirus disease 2019                           |
| 396 | EMA        | European Medicines Agency                          |
| 397 | ICD-10     | International Classification of Disease version 10 |
| 398 | ICU        | intensive care unit                                |
| 399 | IQR        | interquartile range                                |
| 400 | mAb        | monoclonal antibody                                |
| 401 | SARS-CoV-2 | severe acute respiratory syndrome coronavirus 2    |
| 402 | SD         | standard deviation                                 |

## 403 **Declarations**

## 404 **Acknowledgements**

405 The authors wish to thank the Ghent University Hospital Data Science Institute for its support  
406 and role in this study.

407 Editorial support (in the form of writing assistance, including preparation of the draft  
408 manuscript under the direction and guidance of the authors, collating and incorporating  
409 authors' comments for each draft, assembling tables, grammatical editing and referencing)  
410 was provided by Kathryn Wardle and Tony Reardon of Apollo, OPEN Health  
411 Communications, in accordance with Good Publication Practice guidelines  
412 ([www.ismpp.org/gpp-2022](http://www.ismpp.org/gpp-2022)). The support was funded by GSK and Vir Biotechnology, Inc.

## 413 **Authors' contributions**

414 Conception: MD, VP, DCG, EJJ, JH, LL

415 Study design: MD, VP, DCG, EJJ, JH, LL, TH, KC, EVB

416 Execution: MD, VP, DCG, EJJ, JH, LL, TH, KC, EVB, MS

417 Acquisition of data: TH, KC, EVB

418 Analysis and interpretation: MD, VP, DCG, EJJ, JH, LL, TH, KC, EVB, MS

419 All authors took part in drafting, revising or critically reviewing the manuscript; gave final  
420 approval of the version to be published; have agreed on the journal to which the article has  
421 been submitted; and agree to be accountable for all aspects of the work.

#### 422 **Funding**

423 This study was funded by GSK and Vir Biotechnology, Inc. (study number 214878).

#### 424 **Availability of data and materials**

425 The datasets used and/or analysed during the current study are not available due to data  
426 privacy.

#### 427 **Competing interests**

428 MS, VP (at time of study), DCG, MD, DDR and EJJ are employees of, and/or shareholders  
429 in, GSK. JH (at time of study) and LL are employees of IQVIA, which received funding from  
430 GSK and Vir Biotechnology, Inc. to conduct the study. TH, KC and EVB are employees of  
431 Ghent University Hospital, which received funding from GSK and Vir Biotechnology, Inc. to  
432 conduct the study. EVB also declares speaker fees paid to her institution from GSK, Gilead  
433 and Pfizer.

434 **Ethics approval and consent to participate**

435 This study complies with all applicable laws regarding subject privacy. No direct subject  
436 contact or primary collection of individual human subject data occurred. Study results were in  
437 tabular form and were aggregate analyses that omit subject identification; therefore,  
438 informed consent was not required. Ethics committee approval was obtained from each of  
439 the participating centres (CHU Saint-Pierre - Comité local d'éthique hospitalier [n° 007]; CHU  
440 Ambroise Paré - Comité d'éthique hospitalier; AZ Damiaan - Ethisch comité [n° 057]; AZ Sint  
441 Lucas Gent - Commissie medische ethiek; Hôpital Erasme ULB - Comité d'éthique  
442 hospitalo-facultaire; UZ Gent - Commissie voor medische ethiek), with the exception of AZ  
443 Maria Middelaers, AZ Groeninge and Jan Yperman. For AZ Maria Middelaers, formal ethics  
444 committee approval is not required for retrospective database studies; however, the study  
445 was approved by a data protection board that oversees information security, ethical and  
446 financial aspects in the context of secondary reuse of health data. For AZ Groeninge and  
447 Jan Yperman, formal ethics approval is not required for retrospective studies; however, a  
448 data access committee at each centre (with medical legal and ethics committee  
449 representation) approved the study.

450 **Consent for publication**

451 Not applicable.

## 452 **References**

- 453 1. Cucinotta D, Vanelli M. WHO declares COVID-19 a pandemic. *Acta Biomed.*  
454 2020;91:157-60.
- 455 2. World Health Organization. WHO coronavirus (COVID-19) dashboard.  
456 <https://covid19.who.int/>. Accessed 21 September 2023.
- 457 3. Sciensano. Belgium COVID-19 epidemiological situation: hospitalisations.  
458 [https://lookerstudio.google.com/embed/u/0/reporting/c14a5cfc-cab7-4812-848c-](https://lookerstudio.google.com/embed/u/0/reporting/c14a5cfc-cab7-4812-848c-0369173148ab/page/uTSKB)  
459 [0369173148ab/page/uTSKB](https://lookerstudio.google.com/embed/u/0/reporting/c14a5cfc-cab7-4812-848c-0369173148ab/page/uTSKB). Accessed 21 September 2023.
- 460 4. Hoge Gezondheidsraad. Aanbevelingen voor het prioriteren van subgroepen van  
461 patiënten jonger dan 65 jaar voor vaccinatie tegen SARS-CoV-2 (fase Ib). HGR NR.  
462 9618 [Recommendations for prioritizing subgroups of patients younger than 65 years  
463 for vaccination against SARS-COV-2 (phase IB). HGR NR. 9618].  
464 [https://www.health.belgium.be/sites/default/files/uploads/fields/fpshealth\\_theme\\_file/2](https://www.health.belgium.be/sites/default/files/uploads/fields/fpshealth_theme_file/20210205_hgr-9618_priorites_vaccination_covid-19_vweb.pdf)  
465 [0210205\\_hgr-9618\\_priorites\\_vaccination\\_covid-19\\_vweb.pdf](https://www.health.belgium.be/sites/default/files/uploads/fields/fpshealth_theme_file/20210205_hgr-9618_priorites_vaccination_covid-19_vweb.pdf). Accessed 21  
466 September 2023.
- 467 5. Centers for Disease Control and Prevention. Underlying medical conditions  
468 associated with higher risk for severe COVID-19: information for healthcare  
469 professionals. [https://www.cdc.gov/coronavirus/2019-ncov/hcp/clinical-](https://www.cdc.gov/coronavirus/2019-ncov/hcp/clinical-care/underlyingconditions.html)  
470 [care/underlyingconditions.html](https://www.cdc.gov/coronavirus/2019-ncov/hcp/clinical-care/underlyingconditions.html). Accessed 21 September 2023.
- 471 6. Sciensano. Belgium COVID-19 epidemiological situation: summary.  
472 [https://lookerstudio.google.com/embed/reporting/c14a5cfc-cab7-4812-848c-](https://lookerstudio.google.com/embed/reporting/c14a5cfc-cab7-4812-848c-0369173148ab/page/ZwmOB)  
473 [0369173148ab/page/ZwmOB](https://lookerstudio.google.com/embed/reporting/c14a5cfc-cab7-4812-848c-0369173148ab/page/ZwmOB). Accessed 21 September 2023.
- 474 7. Gaudinski MR, Coates EE, Houser KV, Chen GL, Yamshchikov G, Saunders JG, et  
475 al. Safety and pharmacokinetics of the Fc-modified HIV-1 human monoclonal

- 476 antibody VRC01LS: a phase 1 open-label clinical trial in healthy adults. PLoS Med.  
477 2018;15:e1002493.
- 478 8. Ko SY, Pegu A, Rudicell RS, Yang ZY, Joyce MG, Chen X, et al. Enhanced neonatal  
479 Fc receptor function improves protection against primate SHIV infection. Nature.  
480 2014;514:642-5.
- 481 9. Pinto D, Park YJ, Beltramello M, Walls AC, Tortorici MA, Bianchi S, et al. Cross-  
482 neutralization of SARS-CoV-2 by a human monoclonal SARS-CoV antibody. Nature.  
483 2020;583:290-5.
- 484 10. Cathcart AL, Havenar-Daughton C, Lempp FA, Ma D, Schmid MA, Agostini ML, et al.  
485 The dual function monoclonal antibodies VIR-7831 and VIR-7832 demonstrate potent  
486 in vitro and in vivo activity against SARS-CoV-2. bioRxiv.  
487 2021;doi.org/10.1101/2021.03.09.434607.
- 488 11. Gupta A, Gonzalez-Rojas Y, Juarez E, Crespo Casal M, Moya J, Rodrigues Falci D,  
489 et al. Effect of sotrovimab on hospitalization or death among high-risk patients with  
490 mild to moderate COVID-19: a randomized clinical trial. JAMA. 2022;327:1236-46.
- 491 12. European Medicines Agency. Xevudy summary of product characteristics  
492 [https://www.ema.europa.eu/en/documents/product-information/xevudy-epar-product-](https://www.ema.europa.eu/en/documents/product-information/xevudy-epar-product-information_en.pdf)  
493 [information\\_en.pdf](https://www.ema.europa.eu/en/documents/product-information/xevudy-epar-product-information_en.pdf). Accessed 21 September 2023.
- 494 13. European Commission. Daily News 28 / 07 / 2021. Coronavirus: commission signs  
495 contract to procure monoclonal anti-body treatment.  
496 [https://ec.europa.eu/commission/presscorner/detail/en/mex\\_21\\_3942](https://ec.europa.eu/commission/presscorner/detail/en/mex_21_3942). Accessed 21  
497 September 2023.
- 498 14. Arickx F, Blot K, Bottieau E, Callens S, Daems J, Dauby N, et al. Task Force COVID  
499 Therapeutics. Advice regarding the purchase of sotrovimab (Xevudy) for the

- 500 treatment of COVID-19 patients in Belgium.  
501 [https://kce.fgov.be/sites/default/files/2022-](https://kce.fgov.be/sites/default/files/2022-02/Task_Force_COVID_Therapeutics_20210202_Advice_on_the_purchase_of__sotr)  
502 [02/Task\\_Force\\_COVID\\_Therapeutics\\_20210202\\_Advice\\_on\\_the\\_purchase\\_of\\_\\_sotr](https://kce.fgov.be/sites/default/files/2022-02/Task_Force_COVID_Therapeutics_20210202_Advice_on_the_purchase_of__sotr)  
503 [ovimab.pdf](https://kce.fgov.be/sites/default/files/2022-02/Task_Force_COVID_Therapeutics_20210202_Advice_on_the_purchase_of__sotr). Accessed 21 September 2023.
- 504 15. Sciensano. Interim clinical guidance for adults with suspected or confirmed COVID-  
505 19 in Belgium; version 26. Accessed 21 September 2023.
- 506 16. European Medicines Agency. Xevudy.  
507 <https://www.ema.europa.eu/en/medicines/human/EPAR/xevudy>. Accessed 21  
508 September 2023.
- 509 17. Australian Government - Department of Health and Aged Care. TGA provisionally  
510 approves GlaxoSmithKline's COVID-19 treatment: sotrovimab (XEVUDY).  
511 [https://www.tga.gov.au/news/media-releases/tga-provisionally-approves-](https://www.tga.gov.au/news/media-releases/tga-provisionally-approves-glaxosmithklines-covid-19-treatment-sotrovimab-xevudy)  
512 [glaxosmithklines-covid-19-treatment-sotrovimab-xevudy](https://www.tga.gov.au/news/media-releases/tga-provisionally-approves-glaxosmithklines-covid-19-treatment-sotrovimab-xevudy). Accessed 21 September  
513 2023.
- 514 18. Medicines & Healthcare products Regulatory Agency. Summary of product  
515 characteristics for Xevudy. [https://www.gov.uk/government/publications/regulatory-](https://www.gov.uk/government/publications/regulatory-approval-of-xevudy-sotrovimab/summary-of-product-characteristics-for-xevudy)  
516 [approval-of-xevudy-sotrovimab/summary-of-product-characteristics-for-xevudy](https://www.gov.uk/government/publications/regulatory-approval-of-xevudy-sotrovimab/summary-of-product-characteristics-for-xevudy).  
517 Accessed 21 September 2023.
- 518 19. GSK. Xevudy (sotrovimab) granted marketing authorisation by the European  
519 Commission for the early treatment of COVID-19. [https://www.gsk.com/en-](https://www.gsk.com/en-gb/media/press-releases/xevudy-sotrovimab-granted-marketing-authorisation-by-the-european-commission-for-the-early-treatment-of-covid-19/)  
520 [gb/media/press-releases/xevudy-sotrovimab-granted-marketing-authorisation-by-the-](https://www.gsk.com/en-gb/media/press-releases/xevudy-sotrovimab-granted-marketing-authorisation-by-the-european-commission-for-the-early-treatment-of-covid-19/)  
521 [european-commission-for-the-early-treatment-of-covid-19/](https://www.gsk.com/en-gb/media/press-releases/xevudy-sotrovimab-granted-marketing-authorisation-by-the-european-commission-for-the-early-treatment-of-covid-19/). Accessed 21 September  
522 2023.
- 523 20. GSK. GSK received approval for monoclonal antibody, “XEVUDY for intravenous  
524 injection” (generic name: sotrovimab), for the treatment of COVID-19.



- 525 [https://jp.gsk.com/media/7512/20210927\\_xevudy-approval-e.pdf](https://jp.gsk.com/media/7512/20210927_xevudy-approval-e.pdf). Accessed 21  
526 September 2023.
- 527 21. Mendiola-Pastrana IR, López-Ortiz E, Río de la Loza-Zamora JG, González J,  
528 Gómez-García A, López-Ortiz G. SARS-CoV-2 variants and clinical outcomes: a  
529 systematic review. *Life (Basel)*. 2022;12:170.
- 530 22. World Health Organization. Coronavirus disease (COVID-19) pandemic.  
531 <https://www.who.int/europe/emergencies/situations/covid-19>. Accessed 21  
532 September 2023.
- 533 23. Superior Health Council. COVID-19 vaccination: autumn / winter season 2022 –  
534 2023. SHC № 9721.  
535 [https://www.health.belgium.be/sites/default/files/uploads/fields/fpshealth\\_theme\\_file/2](https://www.health.belgium.be/sites/default/files/uploads/fields/fpshealth_theme_file/20220706_shc-9721_covid-19_booster_autumn-winter_2022-2023_vweb.pdf)  
536 [0220706\\_shc-9721\\_covid-19\\_booster\\_autumn-winter\\_2022-2023\\_vweb.pdf](https://www.health.belgium.be/sites/default/files/uploads/fields/fpshealth_theme_file/20220706_shc-9721_covid-19_booster_autumn-winter_2022-2023_vweb.pdf).  
537 Accessed 21 September 2023.
- 538 24. Park YJ, Pinto D, Walls AC, Liu Z, De Marco A, Benigni F, et al. Imprinted antibody  
539 responses against SARS-CoV-2 Omicron sublineages. *Science*. 2022;378:619-27.
- 540 25. Jonckheer P, Jaspers V, Costa E, Castanares-Zapatero D, Roberfroid D, Hulstaert F.  
541 Task Force COVID Therapeutics. Home-based medication management for non-  
542 severe SARS-CoV-2 infection. [https://kce.fgov.be/sites/default/files/2022-](https://kce.fgov.be/sites/default/files/2022-05/COVID19_Therapeutics_for_GPs_NoteKCE_06052022.pdf)  
543 [05/COVID19\\_Therapeutics\\_for\\_GPs\\_NoteKCE\\_06052022.pdf](https://kce.fgov.be/sites/default/files/2022-05/COVID19_Therapeutics_for_GPs_NoteKCE_06052022.pdf). Accessed 21  
544 September 2023.
- 545 26. Case JB, Mackin S, Errico JM, Chong Z, Madden EA, Whitener B, et al. Resilience of  
546 S309 and AZD7442 monoclonal antibody treatments against infection by SARS-CoV-  
547 2 Omicron lineage strains. *Nat Commun*. 2022;13:3824.

- 548 27. Uraki R, Kiso M, Iida S, Imai M, Takashita E, Kuroda M, et al. Characterization and  
549 antiviral susceptibility of SARS-CoV-2 Omicron BA.2. *Nature*. 2022;607:119-27.
- 550 28. Sciensano. Belgium COVID-19 epidemiological situation: variants.  
551 [https://lookerstudio.google.com/embed/u/0/reporting/c14a5cfc-cab7-4812-848c-](https://lookerstudio.google.com/embed/u/0/reporting/c14a5cfc-cab7-4812-848c-0369173148ab/page/urrUC)  
552 [0369173148ab/page/urrUC](https://lookerstudio.google.com/embed/u/0/reporting/c14a5cfc-cab7-4812-848c-0369173148ab/page/urrUC). Accessed 21 September 2023.
- 553 29. Sciensano. Belgium COVID-19 epidemiological situation: hospitalisations - clinical  
554 surveillance. [https://lookerstudio.google.com/embed/reporting/c14a5cfc-cab7-4812-](https://lookerstudio.google.com/embed/reporting/c14a5cfc-cab7-4812-848c-0369173148ab/page/JL1qB)  
555 [848c-0369173148ab/page/JL1qB](https://lookerstudio.google.com/embed/reporting/c14a5cfc-cab7-4812-848c-0369173148ab/page/JL1qB). Accessed 21 September 2023.
- 556 30. Drysdale M, Gibbons DC, Singh M, Rolland C, Lavoie L, Skingsley A, et al. Real-  
557 world effectiveness of sotrovimab for the treatment of SARS-CoV-2 infection during  
558 Omicron BA.2 subvariant predominance: a systematic literature review. *medRxiv*.  
559 2023;doi.org/10.1101/2023.03.09.23287034.
- 560 31. Sciensano. Belgium COVID-19 epidemiological situation: deaths.  
561 [https://lookerstudio.google.com/embed/reporting/c14a5cfc-cab7-4812-848c-](https://lookerstudio.google.com/embed/reporting/c14a5cfc-cab7-4812-848c-0369173148ab/page/QTSKB)  
562 [0369173148ab/page/QTSKB](https://lookerstudio.google.com/embed/reporting/c14a5cfc-cab7-4812-848c-0369173148ab/page/QTSKB). Accessed 21 September 2023.
- 563 32. Wang C, Liu B, Zhang S, Huang N, Zhao T, Lu QB, et al. Differences in incidence  
564 and fatality of COVID-19 by SARS-CoV-2 Omicron variant versus Delta variant in  
565 relation to vaccine coverage: a world-wide review. *J Med Virol*. 2023;95:e28118.
- 566 33. Sigal A, Milo R, Jassat W. Estimating disease severity of Omicron and Delta SARS-  
567 CoV-2 infections. *Nat Rev Immunol*. 2022;22:267-9.
- 568 34. Cheng MM, Reyes C, Satram S, Birch H, Gibbons DC, Drysdale M, et al. Real-world  
569 effectiveness of sotrovimab for the early treatment of COVID-19 during SARS-CoV-2  
570 Delta and Omicron waves in the USA. *Infect Dis Ther*. 2023;12:607-21.

- 571 35. Zheng B, Green ACA, Tazare J, Curtis HJ, Fisher L, Nab L, et al. Comparative  
572 effectiveness of sotrovimab and molnupiravir for prevention of severe covid-19  
573 outcomes in patients in the community: observational cohort study with the  
574 OpenSAFELY platform. *BMJ*. 2022;379:e071932.
- 575 36. Harman K, Nash SG, Webster HH, Groves N, Hardstaff J, Bridgen J, et al.  
576 Comparison of the risk of hospitalisation among BA.1 and BA.2 COVID-19 cases  
577 treated with sotrovimab in the community in England. *Influenza Other Respir Viruses*.  
578 2023;17:e13150.
- 579 37. Razonable RR, Tulledge-Scheitel SM, Hanson SN, Arndt RF, Speicher LL, Seville  
580 TA, et al. Real-world clinical outcomes of bebtelovimab and sotrovimab treatment of  
581 high-risk persons with coronavirus disease 2019 during the Omicron epoch. *Open  
582 Forum Infect Dis*. 2022;9:ofac411.
- 583 38. Evans A, Qi C, Adebayo JO, Underwood J, Coulson J, Bailey R, et al. Real-world  
584 effectiveness of molnupiravir, nirmatrelvir-ritonavir, and sotrovimab on preventing  
585 hospital admission among higher-risk patients with COVID-19 in Wales: a  
586 retrospective cohort study. *J Infect*. 2023;86:352-60.
- 587 39. Patel V, Yarwood MJ, Levick B, Gibbons DC, Drysdale M, Kerr W, et al.  
588 Characteristics and outcomes of patients with COVID-19 at high-risk of disease  
589 progression receiving sotrovimab, oral antivirals or no treatment in England.  
590 *medRxiv*. 2022;doi.org/10.1101/2022.11.28.22282808.
- 591 40. Rasmussen LD, Lebech AM, Øvrehus A, Poulsen BK, Christensen HR, Nielsen H, et  
592 al. Experience with sotrovimab treatment of SARS-CoV-2-infected patients in  
593 Denmark. *Br J Clin Pharmacol*. 2023;89:1820-33.
- 594 41. De Mot L, Robalo Q, Dockx Y, Vandromme M, De Pauw R, Serrien B, et al. COVID-  
595 19 clinical hospital surveillance report. [https://covid-](https://covid-19clinicalhospitalreport.be/)

596 19.sciensano.be/sites/default/files/Covid19/COVID-  
597 19\_Hospital\_epidemiology\_Part\_1.pdf. Accessed 21 September 2023.  
598 42. Sciensano. Belgium COVID-19 epidemiological situation: vaccination.  
599 [https://lookerstudio.google.com/embed/reporting/c14a5cfc-cab7-4812-848c-](https://lookerstudio.google.com/embed/reporting/c14a5cfc-cab7-4812-848c-0369173148ab/page/p_j1f02pfnpc)  
600 [0369173148ab/page/p\\_j1f02pfnpc](https://lookerstudio.google.com/embed/reporting/c14a5cfc-cab7-4812-848c-0369173148ab/page/p_j1f02pfnpc). Accessed 21 September 2023.

601

602 **Additional files**

603 Additional file 1 (PDF) - Supplementary Appendix, containing ATC and ICD-10 codes used in  
604 this study, and all-cause and COVID-19-related outcomes by study month

605

It is made available under a [CC-BY 4.0 International license](https://creativecommons.org/licenses/by/4.0/).

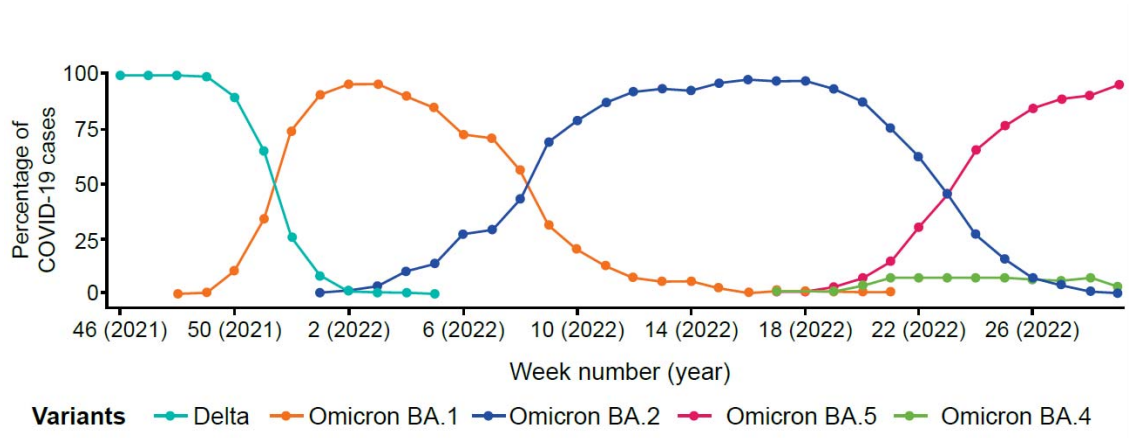

**Fig. 1** Proportion of SARS-CoV-2 variants over time in Belgium [28]. SARS-CoV-2=severe acute respiratory syndrome coronavirus 2
