# Supplementary material for: Characteristics and outcomes of patients treated with sotrovimab to prevent progression to severe COVID-19 in Belgium
Source: bioRxiv or medRxiv preprint supplement (doi:10.1101/2023.12.14.23298578), 2023-12-18
Supplement: Supplementary file [file media-1.pdf]

## Supplementary Appendix

**Table S1** List of immunosuppressant and cancer treatment drugs

| Drug name                      | ATC code                  |
|--------------------------------|---------------------------|
| <b>Immunosuppressant drugs</b> |                           |
| 6-mercaptopurine               | L01BB02                   |
| Abatacept                      | L04AA24                   |
| Adalimumab                     | L04AB04                   |
| Alemtuzumab                    | L04AA34                   |
| Anakinra                       | L04AC03                   |
| Apremilast                     | L04AA32                   |
| Azathioprine                   | L04AX01                   |
| Baricitinib                    | L04AA37                   |
| Basiliximab                    | L04AC02                   |
| Belatacept                     | L04AA28                   |
| Belimumab                      | L04AA26                   |
| Bendamustine                   | L01AA09                   |
| Brentuximab                    | L01FX05                   |
| Busulfan                       | L01AB01                   |
| Canakinumab                    | L04AC08                   |
| Certolizumab                   | L04AB05                   |
| Chlorambucil                   | L01AA02                   |
| Cyclophosphamide               | L01AA01                   |
| Cyclosporine                   | L04AD01                   |
| Dacarbazine                    | L01AX04                   |
| Daclizumab                     | L04AC01                   |
| Dimethyl fumarate              | L04AX07, N07XX09          |
| Eculizumab                     | L04AA25                   |
| Elotuzumab                     | L01FX08                   |
| Estramustine                   | L01XX11                   |
| Etanercept                     | L04AB01                   |
| Everolimus                     | L04AA18, L01EG02, L01EG01 |
| Fingolimod                     | L04AA27                   |
| Fotemustine                    | L01AD05                   |
| Glatiramer acetate             | L03AX13                   |
| Golimumab                      | L04AB06                   |
| Ifosfamide                     | L01AA06                   |

|                                                   |                                                         |
|---------------------------------------------------|---------------------------------------------------------|
| Infliximab                                        | L04AB02                                                 |
| Ipilimumab                                        | L01FX04                                                 |
| Ixekizumab                                        | L04AC13                                                 |
| Leflunomide                                       | L04AA13                                                 |
| Melphalan                                         | L01AA03                                                 |
| Methotrexate                                      | L01BA01, L04AX03                                        |
| Mitoxantrone                                      | L01DB07                                                 |
| Mycophenolate mofetil                             | L04AA06                                                 |
| Natalizumab                                       | L04AA23                                                 |
| Obinutuzumab                                      | L01FA03                                                 |
| Prednisone (≥20 mg for ≥14 days)                  | S01BA04, H02AB06, A07EA01, C05AA04,<br>R01AD02, S01BA03 |
| Rituximab                                         | L01FA01                                                 |
| Secukinumab                                       | L04AC10                                                 |
| Siltuximab                                        | L04AC11                                                 |
| Sirolimus                                         | L04AA10, S01XA23                                        |
| Tacrolimus                                        | L04AD02                                                 |
| Temozolomide                                      | L01AX03                                                 |
| Teriflunomide                                     | L04AA31                                                 |
| Thiotepa                                          | L01AC01                                                 |
| Tocilizumab                                       | L04AC07                                                 |
| Tofacitinib                                       | L04AA29                                                 |
| Ustekinumab                                       | L04AC05                                                 |
| Vedolizumab                                       | L04AA33                                                 |
| <b>Cancer treatment: radiotherapy drugs</b>       |                                                         |
| Radium dichloride                                 | V10XX03                                                 |
| <b>Cancer treatment: drugs</b>                    |                                                         |
| Antineoplastic agents and immunomodulating agents | L01                                                     |
| Endocrine therapy                                 | L02                                                     |
| Immunostimulants                                  | L03                                                     |

ATC=Anatomical Therapeutic Chemical.

**Table S2** List of ICD-10 codes to identify immunocompromised patients and other comorbidities

| ICD-10 codes                                                                | Description                                                                                         |
|-----------------------------------------------------------------------------|-----------------------------------------------------------------------------------------------------|
| <b>HIV</b>                                                                  |                                                                                                     |
| B20                                                                         | Human immunodeficiency virus (HIV) disease                                                          |
| B97.35                                                                      | Human immunodeficiency virus, type 2 (HIV-2)                                                        |
| <b>Primary immune deficiency (disorders involving the immune mechanism)</b> |                                                                                                     |
| D50–D89                                                                     | Diseases of the blood and blood-forming organs and certain disorders involving the immune mechanism |
| K50                                                                         | Crohn's disease (regional enteritis)                                                                |
| K51.90                                                                      | Ulcerative enterocolitis                                                                            |
| K52.9                                                                       | Other and unspecified non-infectious gastroenteritis and colitis                                    |
| L40                                                                         | Psoriasis                                                                                           |
| M06.4                                                                       | Rheumatoid arthritis and other inflammatory polyarthropathies                                       |
| M32.9                                                                       | Systemic lupus erythematosus                                                                        |
| Q89.0, Q89.01                                                               | Asplenia (congenital)                                                                               |
| <b>Transplant</b>                                                           |                                                                                                     |
| T86                                                                         | Complications of transplanted organs and tissue                                                     |
| Z94                                                                         | Transplanted organ and tissue status                                                                |
| <b>Solid tumours</b>                                                        |                                                                                                     |
| C00–C14                                                                     | Malignant neoplasms of lip, oral cavity and pharynx                                                 |
| C15–C26                                                                     | Malignant neoplasms of digestive organs                                                             |
| C30–C39                                                                     | Malignant neoplasms of respiratory and intrathoracic organs                                         |
| C40–C41                                                                     | Malignant neoplasms of bone and articular cartilage                                                 |
| C43–C44                                                                     | Melanoma and other malignant neoplasms of skin                                                      |
| C45–C49                                                                     | Malignant neoplasms of mesothelial and soft tissue                                                  |
| C50                                                                         | Malignant neoplasms of breast                                                                       |
| C51–C58                                                                     | Malignant neoplasms of female genital organs                                                        |
| C60–C63                                                                     | Malignant neoplasms of male genital organs                                                          |
| C64–C68                                                                     | Malignant neoplasms of urinary tract                                                                |
| C69–C72                                                                     | Malignant neoplasms of eye, brain and other parts of central nervous system                         |
| C73–C75                                                                     | Malignant neoplasms of thyroid and other endocrine glands                                           |
| C76–C80                                                                     | Malignant neoplasms of ill-defined, other secondary and unspecified sites                           |
| C7A                                                                         | Malignant neuroendocrine tumours                                                                    |
| C7B                                                                         | Secondary neuroendocrine tumours                                                                    |
| D00–D09                                                                     | <i>In situ</i> neoplasms                                                                            |

|                                    |                                                                                                                                         |
|------------------------------------|-----------------------------------------------------------------------------------------------------------------------------------------|
| D49                                | Neoplasms of unspecified behaviour                                                                                                      |
| D37–D44                            | Neoplasms of uncertain behaviour                                                                                                        |
| D48                                | Neoplasm of uncertain behaviour of other and unspecified sites                                                                          |
| <b>Haematological malignancies</b> |                                                                                                                                         |
| C81–C96                            | Malignant neoplasms of lymphoid, haematopoietic and related tissue                                                                      |
| D45–D47                            | Polycythaemia vera, myelodysplastic syndromes and other neoplasms of uncertain behaviour of lymphoid, haematopoietic and related tissue |
| <b>Sickle cell anaemia</b>         |                                                                                                                                         |
| D57.0                              | Hb-SS disease with crisis                                                                                                               |
| D57.1                              | Sickle cell disease without crisis                                                                                                      |
| D57.2                              | Sickle cell/Hb-C disease                                                                                                                |
| <b>Major thalassaemia</b>          |                                                                                                                                         |
| D56.0                              | Alpha thalassaemia                                                                                                                      |
| D56.1                              | Beta thalassaemia                                                                                                                       |
| <b>Chronic kidney disease</b>      |                                                                                                                                         |
| N17                                | Acute kidney failure                                                                                                                    |
| N18.4                              | CKD Stage 4                                                                                                                             |
| N18.5                              | CKD Stage 5                                                                                                                             |
| N18.6                              | ESRD                                                                                                                                    |
| Z99.2                              | Dependence on renal dialysis                                                                                                            |
| Z49                                | Encounter for other dialysis                                                                                                            |
| Z49.01                             | Fitting and adjustment of extracorporeal dialysis catheter                                                                              |
| Z49.02                             | Peritoneal dialysis                                                                                                                     |
| Z49.31                             | Encounter for adequacy testing for haemodialysis                                                                                        |
| Z49.32                             | Encounter for adequacy testing for peritoneal haemodialysis                                                                             |
| <b>Chronic liver disease</b>       |                                                                                                                                         |
| I85.10                             | Oesophageal varices in diseases classified elsewhere, without mention of bleeding                                                       |
| K72.00                             | Acute and subacute necrosis of liver                                                                                                    |
| K72.10                             | Other sequelae of chronic liver disease                                                                                                 |
| K73                                | Chronic hepatitis, not elsewhere classified                                                                                             |
| K72.91                             | Hepatic encephalopathy                                                                                                                  |
| K73.9                              | Hepatitis, unspecified                                                                                                                  |
| K74                                | Fibrosis and cirrhosis of liver                                                                                                         |
| K76.6                              | Portal hypertension                                                                                                                     |
| K76.7                              | Hepatorenal syndrome                                                                                                                    |
| K76.81                             | Hepatopulmonary syndrome                                                                                                                |

|                                       |                                                       |
|---------------------------------------|-------------------------------------------------------|
| K76.89                                | Liver disorders                                       |
| K76.9                                 | Unspecified disorder of liver                         |
| K76.1                                 | Chronic passive congestion of liver                   |
| R18.8                                 | Other ascites                                         |
| <b>Type 1 or type 2 diabetes</b>      |                                                       |
| E08                                   | Diabetes mellitus due to underlying condition         |
| E09                                   | Drug or chemical induced diabetes mellitus            |
| E10                                   | Type 1 diabetes mellitus                              |
| E11                                   | Type 2 diabetes mellitus                              |
| E13                                   | Other specified diabetes mellitus                     |
| <b>Obesity</b>                        |                                                       |
| E66.0                                 | Obesity due to excess calories                        |
| E66.1                                 | Drug-induced obesity                                  |
| E66.2                                 | Morbid (severe) obesity with alveolar hypoventilation |
| E66.8                                 | Other obesity                                         |
| E66.9                                 | Obesity, unspecified                                  |
| <b>Chronic cardiovascular disease</b> |                                                       |
| I20–I25                               | Ischaemic heart diseases                              |
| I27.0                                 | Primary pulmonary hypertension                        |
| I27.2                                 | Other secondary pulmonary hypertension                |
| I27.81                                | Cor pulmonale (chronic)                               |
| I27.9                                 | Pulmonary heart disease, unspecified                  |
| I5A                                   | Non-ischaemic myocardial injury (nontraumatic)        |
| I30–I52                               | Other forms of heart disease                          |
| Q20–Q28                               | Congenital malformations of the circulatory system    |
| <b>Chronic lung disease</b>           |                                                       |
| E84.9                                 | Cystic fibrosis, unspecified                          |
| E84.11                                | Meconium ileus in cystic fibrosis                     |
| I26                                   | Pulmonary embolism                                    |
| E84.0                                 | Cystic fibrosis with pulmonary manifestations         |
| I27.82                                | Chronic pulmonary embolism                            |
| J44.9                                 | Chronic obstructive pulmonary disease                 |
| J45.901                               | Unspecified asthma with (acute) exacerbation          |
| J45.902                               | Unspecified asthma with status asthmaticus            |
| J84.10                                | Pulmonary fibrosis, unspecified                       |
| J84.89                                | Other specified interstitial pulmonary diseases       |
| J98.4                                 | Other disorders of lung                               |
| <b>Chronic neurological disease</b>   |                                                       |
| A81.01                                | Variant Creutzfeldt–Jakob disease                     |

|                                                       |                                                                                      |
|-------------------------------------------------------|--------------------------------------------------------------------------------------|
| F01.50                                                | Vascular dementia without behavioural disturbance                                    |
| F07.0                                                 | Personality change due to known physiological condition                              |
| G10                                                   | Huntington's disease                                                                 |
| G20                                                   | Parkinson's disease                                                                  |
| G21                                                   | Secondary parkinsonism                                                               |
| G23                                                   | Other degenerative diseases of basal ganglia                                         |
| G24                                                   | Dystonia                                                                             |
| G25                                                   | Other extrapyramidal and movement disorders                                          |
| G26                                                   | Extrapyramidal and movement disorders in diseases classified elsewhere               |
| G30                                                   | Alzheimer's disease                                                                  |
| G31                                                   | Other degenerative diseases of nervous system, not elsewhere classified              |
| G32                                                   | Other degenerative disorders of nervous system in diseases classified elsewhere      |
| I60                                                   | Nontraumatic subarachnoid haemorrhage                                                |
| I61                                                   | Nontraumatic intracerebral haemorrhage                                               |
| I62                                                   | Other and unspecified nontraumatic intracranial haemorrhage                          |
| I63                                                   | Cerebral infarction                                                                  |
| I65                                                   | Occlusion and stenosis of precerebral arteries, not resulting in cerebral infarction |
| I66                                                   | Occlusion and stenosis of cerebral arteries, not resulting in cerebral infarction    |
| I67                                                   | Other cerebrovascular diseases                                                       |
| I68                                                   | Cerebrovascular disorders in diseases classified elsewhere                           |
| I69                                                   | Sequelae of cerebrovascular disease                                                  |
| R47.01                                                | Aphasia                                                                              |
| R40.20                                                | Unspecified coma                                                                     |
| <b>Cancer treatment: radiotherapy or chemotherapy</b> |                                                                                      |
| Z51.0                                                 | Encounter for antineoplastic radiation therapy                                       |
| Z51.1                                                 | Encounter for antineoplastic chemotherapy and immunotherapy                          |
| <b>COVID-19-related hospitalizations</b>              |                                                                                      |
| B34.2                                                 | Coronavirus infection, unspecified                                                   |
| U07.1                                                 | COVID-19                                                                             |
| B97.2                                                 | Coronavirus as the cause of diseases classified elsewhere                            |

CKD=chronic kidney disease, COVID-19=coronavirus disease 2019, ESRD=end-stage renal disease, HIV=human immunodeficiency virus, ICD-10=International Classification of Disease version 10

**Table S3** List of ICD-10 procedure codes

| ICD-10 codes                           | Description                                                                                                                                                          |
|----------------------------------------|----------------------------------------------------------------------------------------------------------------------------------------------------------------------|
| <b>Invasive mechanical ventilation</b> |                                                                                                                                                                      |
| 0BH13EZ                                | Insertion of endotracheal airway into trachea, percutaneous approach                                                                                                 |
| 0BH17EZ                                | Insertion of endotracheal airway into trachea, via natural or artificial opening                                                                                     |
| 0BH18EZ                                | Insertion of endotracheal airway into trachea, via natural or artificial opening                                                                                     |
| 0B110F4                                | Bypass trachea to cutaneous with tracheostomy device, open approach                                                                                                  |
| 0B110Z4                                | Bypass trachea to cutaneous, open approach                                                                                                                           |
| 0B113F4                                | Bypass trachea to cutaneous with tracheostomy device, percutaneous approach                                                                                          |
| 0B113Z4                                | Bypass trachea to cutaneous, percutaneous approach                                                                                                                   |
| 0B114F4                                | Bypass trachea to cutaneous with tracheostomy device, percutaneous endoscopic approach                                                                               |
| 0B114Z4                                | Bypass trachea to cutaneous, percutaneous endoscopic approach                                                                                                        |
| 5A1.935Z                               | Extracorporeal or systemic assistance and performance, physiological systems, performance, respiratory, less than 24 consecutive hours, ventilation, no qualifier    |
| 5A1.945Z                               | Extracorporeal or systemic assistance and performance, physiological systems, performance, respiratory, 24–96 consecutive hours, ventilation, no qualifier           |
| 5A1.955Z                               | Extracorporeal or systemic assistance and performance, physiological systems, performance, respiratory, greater than 96 consecutive hours, ventilation, no qualifier |
| <b>Non-invasive ventilation</b>        |                                                                                                                                                                      |
| 5A0.9357                               | Assistance with respiratory ventilation, less than 24 consecutive hours, continuous positive airway pressure                                                         |
| 5A0.9358                               | Assistance with respiratory ventilation, less than 24 consecutive hours, intermittent positive airway pressure                                                       |
| 5A0.9359                               | Assistance with respiratory ventilation, less than 24 consecutive hours, continuous negative airway pressure                                                         |
| 5A0.935B                               | Assistance with respiratory ventilation, less than 24 consecutive hours, intermittent negative airway pressure                                                       |
| 5A0.935Z                               | Assistance with respiratory ventilation, less than 24 consecutive hours                                                                                              |

|          |                                                                                                                   |
|----------|-------------------------------------------------------------------------------------------------------------------|
| 5A0.9457 | Assistance with respiratory ventilation, 24–96 consecutive hours, continuous positive airway pressure             |
| 5A0.9458 | Assistance with respiratory ventilation, 24–96 consecutive hours, intermittent positive airway pressure           |
| 5A0.9459 | Assistance with respiratory ventilation, 24–96 consecutive hours, continuous negative airway pressure             |
| 5A0.945B | Assistance with respiratory ventilation, 24–96 consecutive hours, intermittent negative airway pressure           |
| 5A0.945Z | Assistance with respiratory ventilation, 24–96 consecutive hours                                                  |
| 5A0.9557 | Assistance with respiratory ventilation, greater than 96 consecutive hours, continuous positive airway pressure   |
| 5A0.9558 | Assistance with respiratory ventilation, greater than 96 consecutive hours, intermittent positive airway pressure |
| 5A0.9559 | Assistance with respiratory ventilation, greater than 96 consecutive hours, continuous negative airway pressure   |
| 5A0.955B | Assistance with respiratory ventilation, greater than 96 consecutive hours, intermittent negative airway pressure |
| 5A0.955Z | Assistance with respiratory ventilation, greater than 96 consecutive hours                                        |
| 5A1.9054 | Respiratory ventilation, dingle, nonmechanical                                                                    |
| Z99.11   | Dependence on respirator (ventilator) status                                                                      |

ICD-10=International Classification of Disease version 10



**Table S4** Acute period (29-day) all-cause and COVID-19-related outcomes by study month

| Outcome                                          | Study month  |             |              |              |            |              |              |            |            |            |
|--------------------------------------------------|--------------|-------------|--------------|--------------|------------|--------------|--------------|------------|------------|------------|
|                                                  | Overall      | Nov 2021    | Dec 2021     | Jan 2022     | Feb 2022   | Mar 2022     | Apr 2022     | May 2022   | Jun 2022   | Jul 2022   |
| Number of patients treated with sotrovimab       | 634          | 20          | 44           | 178          | 112        | 148          | 127          | 1          | 2          | 2          |
| Hospitalized due to any cause, <i>n</i> (%)      | 79<br>(12.5) | 4<br>(20.0) | 10<br>(22.7) | 20<br>(11.2) | 9<br>(8.0) | 22<br>(14.9) | 14<br>(11.0) | 0<br>(0.0) | 0<br>(0.0) | 0<br>(0.0) |
| Hospitalized due to COVID-19, <i>n</i> (%)       | 16<br>(2.5)  | 0<br>(0.0)  | 4<br>(9.1)   | 2<br>(1.1)   | 3<br>(2.7) | 4<br>(2.7)   | 3<br>(2.4)   | 0<br>(0.0) | 0<br>(0.0) | 0<br>(0.0) |
| Hospitalized due to unknown reason, <i>n</i> (%) | 7<br>(1.1)   | 0<br>(0.0)  | 1<br>(2.3)   | 5<br>(2.8)   | 1<br>(0.9) | 0<br>(0.0)   | 0<br>(0.0)   | 0<br>(0.0) | 0<br>(0.0) | 0<br>(0.0) |
| Died due to any cause, <i>n</i> (%)              | 7<br>(1.1)   | 0<br>(0.0)  | 1<br>(2.3)   | 2<br>(1.1)   | 2<br>(1.8) | 2<br>(1.4)   | 0<br>(0.0)   | 0<br>(0.0) | 0<br>(0.0) | 0<br>(0.0) |

COVID-19=coronavirus disease 2019
